# Supplementary material
Source: PubMed Central journal article supplement (PMC6439688)
Supplement: jamainternmed-179-363-s001.pdf [file jamainternmed-179-363-s001.pdf]

## Supplementary Online Content

Levine DM, Landon BE, Linder JA. Quality and experience of outpatient care in the United States for adults with or without primary care. *JAMA Intern Med*. Published online January 28, 2019. doi:10.1001/jamainternmed.2018.6716

**eTable 1.** Clinical and Patient Experience Quality Measures

**eTable 2.** Additional Characteristics of the Medical Expenditure Panel Survey Respondents With and Without Primary Care, 2012-2014

**eTable 3.** Propensity-Score Weighted Outpatient Quality and Experience for Patients With Primary Care Versus Those Without Primary Care and No Outpatient Visit, 2012-2014

**eTable 4.** Health Care Utilization With and Without Primary Care Without Propensity Score Weighting, 2012-2014

**eTable 5.** Outpatient Quality and Experience With and Without Primary Care Without Propensity Score Weighting, 2012-2014

**eTable 6.** Characteristics of the Medical Expenditure Panel Survey Respondents With and Without Primary Care, 2002-2004

**eTable 7.** Additional Characteristics of the Medical Expenditure Panel Survey Respondents With and Without Primary Care, 2002-2004

**eTable 8.** Health Care Utilization With and Without Primary Care, 2002-2004

**eTable 9.** Propensity Score Weighted Outpatient Quality and Experience With and Without Primary Care, 2002-2004

**eTable 10.** Outpatient Quality and Experience Without Propensity Score Weighting With and Without Primary Care, 2002-2004

This supplementary material has been provided by the authors to give readers additional information about their work.

**eTable 1.** Clinical and Patient Experience Quality Measures

| Measure                                                       | MEPS Data Source <sup>a</sup> | Reference <sup>b</sup> | Numerator                                                                                                            | Denominator <sup>c</sup>          |
|---------------------------------------------------------------|-------------------------------|------------------------|----------------------------------------------------------------------------------------------------------------------|-----------------------------------|
| <b>Underuse Clinical Care</b>                                 |                               |                        |                                                                                                                      |                                   |
| <b>Recommended Cancer Screening</b>                           |                               |                        |                                                                                                                      |                                   |
| Cervical cancer screening                                     | SR                            | 33                     | Papanicolaou smear within past 3 years                                                                               | Women, age 21-65, no hysterectomy |
| Breast cancer screening                                       | SR                            | 34                     | Mammogram within past 2 years                                                                                        | Women, age 50-74                  |
| Colorectal cancer screening                                   | SR                            | 35                     | Colonoscopy within past 10 years, sigmoidoscopy within past 5 years, or hemoccult test within past year <sup>d</sup> | Age 50-75                         |
| <b>Recommended Diagnostic and Preventive Testing</b>          |                               |                        |                                                                                                                      |                                   |
| Dental care                                                   | SR                            | 36                     | Dental visit within 1 year                                                                                           | All                               |
| Blood pressure measurement                                    | SR                            | 37                     | Blood pressure measurement within 2 years                                                                            | All                               |
| Cholesterol measurement                                       | SR                            | 38                     | Cholesterol measurement within any interval                                                                          | Age >= 35                         |
| Influenza vaccine                                             | SR                            | 39                     | Influenza vaccine within 1 year                                                                                      | Age >= 50                         |
| <b>Recommended Diabetes Care</b>                              |                               |                        |                                                                                                                      |                                   |
| A1c measurement                                               | DCS                           | 40                     | A1c measurement at least twice yearly                                                                                | All with diabetes                 |
| Foot exam                                                     | DCS                           | 40                     | Foot exam within 1 year                                                                                              | All with diabetes                 |
| Eye exam                                                      | DCS                           | 40                     | Retinal exam within 1 year                                                                                           | All with diabetes                 |
| <b>Recommended Counseling</b>                                 |                               |                        |                                                                                                                      |                                   |
| Weight loss counseling                                        | SR                            | 41                     | Within 1 year                                                                                                        | All overweight/obese              |
| Exercise counseling                                           | SR                            | 41                     | Within 1 year                                                                                                        | All overweight/obese              |
| Smoking cessation counseling                                  | SR                            | 42                     | Within 1 year                                                                                                        | All smokers                       |
| <b>Recommended Medical Treatment</b>                          |                               |                        |                                                                                                                      |                                   |
| Anticoagulation for atrial fibrillation                       | SR, C, P                      | 43                     | Anticoagulant prescription                                                                                           | Atrial fibrillation               |
| ACEi/ARB for heart failure                                    | SR, C, P                      | 44                     | ACEi/ARB prescription                                                                                                | Heart failure                     |
| Beta blocker for heart failure                                | SR, C, P                      | 44                     | Beta blocker prescription                                                                                            | Heart failure                     |
| Salicylates and/or platelet aggregation inhibitors for CAD/MI | SR, C, P                      | 45                     | Salicylates and/or platelet aggregation inhibitor prescription                                                       | CAD/MI                            |
| Beta blocker for CAD/MI                                       | SR, C, P                      | 45                     | Beta blocker prescription                                                                                            | CAD/MI                            |
| Statin for CAD/MI                                             | SR, C, P                      | 45                     | Statin prescription                                                                                                  | CAD/MI                            |
| Statin for dyslipidemia                                       | SR, C, P                      |                        | Statin prescription                                                                                                  | Dyslipidemia                      |

|                                                              |          |          |                                                |                                                |
|--------------------------------------------------------------|----------|----------|------------------------------------------------|------------------------------------------------|
| ACEi/ARB for diabetes & hypertension                         | SR, C, P | 40       | ACEi/ARB prescription                          | Diabetes + hypertension                        |
| Statin for CVA                                               | SR, C, P | 46       | Statin prescription                            | CVA                                            |
| Antiplatelet for CVA                                         | SR, C, P | 46       | Anti-platelet prescription                     | CVA                                            |
| Controller medication for poorly controlled asthma           | SR, C, P | 47       | ICS or ICS+LABA                                | Asthma + systemic steroid in past year         |
| Controller medication for poorly controlled COPD             | SR, C, P | 48       | ICS+LABA or LAMA+LABA or ICS+LAMA+LABA         | COPD + systemic steroid in past year           |
| <b>Inappropriate Clinical Care</b>                           |          |          |                                                |                                                |
| <b>Inappropriate Cancer Screening Avoidance</b>              |          |          |                                                |                                                |
| Cervical cancer screening in older adults                    | SR       | 33       | Papanicolaou smear                             | Women, Age > 65                                |
| Colorectal cancer screening in older adults                  | SR       | 35       | Colonoscopy, sigmoidoscopy, or hemeoccult test | Age > 75                                       |
| Prostate cancer screening in older adults                    | SR       | 49       | Prostate specific antigen test                 | Men, Age > 75                                  |
| <b>Inappropriate Antibiotic Use Avoidance</b>                |          |          |                                                |                                                |
| Antibiotics for acute bronchitis                             | SR, C, P | 17,50,51 | Antibiotic prescription during visit           | Acute bronchitis visit                         |
| Antibiotics for acute URI                                    | SR, C, P | 50,51    | Antibiotic prescription during visit           | Acute URI visit                                |
| Antibiotics for influenza                                    | SR, C, P | 50       | Antibiotic prescription during visit           | Influenza visit                                |
| <b>Inappropriate Medical Treatment Avoidance</b>             |          |          |                                                |                                                |
| Inappropriate medications in the elderly                     | SR, P    | 52       | Anxiolytic, sedative, or hypnotic prescription | Age > 65                                       |
| Benzodiazepine for depression                                | SR, P    | 53       | Benzodiazepine prescription                    | Depression                                     |
| Opioid for headache                                          | SR, C, P | 54       | Opioid prescription during visit               | Headache visit                                 |
| Opioid for back pain                                         | SR, C, P | 55       | Opioid prescription during visit               | Back pain visit                                |
| NSAID use for hypertension, heart failure, or kidney disease | SR, C, P | 56       | NSAID prescription                             | Hypertension, heart failure, or kidney disease |
| <b>Inappropriate Imaging Avoidance</b>                       |          |          |                                                |                                                |
| MRI/CT for back pain                                         | C        | 57       | MRI/CT within 1 month of visit <sup>e</sup>    | Back pain visit                                |
| X-ray for back pain                                          | C        | 57       | X-ray within 1 month of visit                  | Back pain visit                                |

|                                                       |     |       |                                    |                |
|-------------------------------------------------------|-----|-------|------------------------------------|----------------|
| MRI/CT for headache                                   | C   | 58    | MRI/CT during visit                | Headache visit |
| <b>Patient Experience</b>                             |     |       |                                    |                |
| <b>Global Rating of Health Care</b>                   |     |       |                                    |                |
| Global rating of health care (0=“worst” to 10=“best”) | SAQ | CAHPS | Top-coded 8, 9, or 10 <sup>f</sup> | All            |
| <b>Doctor Communication</b>                           |     |       |                                    |                |
| Doctor listened to you (1=“never” to 4=“always”)      | SAQ | CAHPS | Top-coded 4 <sup>e</sup>           | All            |
| Doctor explained so you understood (1-4)              | SAQ | CAHPS | Top-coded 4 <sup>e</sup>           | All            |
| Doctor showed respect (1-4)                           | SAQ | CAHPS | Top-coded 4 <sup>e</sup>           | All            |
| Doctor spent enough time with you (1-4)               | SAQ | CAHPS | Top-coded 4 <sup>e</sup>           | All            |
| <b>Access to Care</b>                                 |     |       |                                    |                |
| Got care when ill or injured as soon as wanted (1-4)  | SAQ | CAHPS | Top-coded 4 <sup>e</sup>           | All            |
| Got medical appointment as soon as wanted (1-4)       | SAQ | CAHPS | Top-coded 4 <sup>e</sup>           | All            |

<sup>a</sup> MEPS combines multiple data sources (see **Methods** for details): C = clinician; DCS = diabetes care survey; P = pharmacy; SAQ = self-administered questionnaire; SR = self-report of household. Please note that the DCS and SAQ are self-report surveys.

<sup>b</sup> Where possible, these references refer to a detailed discussion of the clinical area that supports each measure. The National Quality Forum and other organizations have adopted these discussions to a measure definition with numerators and denominators (eAppendix for further details). Also, because clinical recommendations change over time, we used consistent measure definitions to ensure valid comparison (see **Methods** for details).

<sup>c</sup> See **eAppendix** for details and sensitivity analyses regarding identification of visit types.

<sup>d</sup> From 2009-2013, we were able to extract the numerator as given. From 2002-2008, we were not able to distinguish between colonoscopy and sigmoidoscopy, nor between a 5-year or 10-year screening interval, nor between screening vs diagnostic procedure. The change in phrasing of this question likely follows the change in recommendations.<sup>59</sup>

<sup>e</sup> Most measures recommend a 6 week delay, but the MEPS only consistently separates visits by month.

<sup>f</sup> “Top-coded” indicates that a response was dichotomized as follows: response of 4 on a 1-4 Likert scale or responses of 8, 9, or 10 on a 0-10 Likert scale were counted as positive. For comparison, we present linear measures rescaled 0 to 10 in the supplement (**eFigure 1**).

**Abbreviations:** A1c, hemoglobin A1c; ACEi, angiotensin converting enzyme inhibitor; ARB, angiotensin receptor blocker; CAD/MI, coronary artery disease / myocardial infarction; CAHPS, Consumer Assessment of Healthcare Providers and Systems; COPD, chronic obstructive pulmonary disease; CT, computed tomography; CVA, cerebral vascular accident; ICS, inhaled corticosteroid; LABA, long-acting beta agonist; LAMA, long-acting muscarinic antagonist; MRI, magnetic resonance imaging; NSAID, nonsteroidal anti-inflammatory drug; URI, upper respiratory infection

**Note:** This table was copied verbatim from Levine DM, Linder JA, Landon BE. The Quality of Outpatient Care Delivered to Adults in the United States, 2002 to 2013. *JAMA Intern Med.* 2016;176(12):1778. The references to Figures, Methods, and Appendices refers to the original paper.

**eTable 2.** Additional Characteristics of the Medical Expenditure Panel Survey Respondents With and Without Primary Care, 2012-2014

|                                                  | Without propensity score weighting             |                                 | With propensity score weighting <sup>a</sup> |                                 |
|--------------------------------------------------|------------------------------------------------|---------------------------------|----------------------------------------------|---------------------------------|
|                                                  | No Primary Care<br>(n = 21133)                 | Has Primary Care<br>(n = 49286) | No Primary Care<br>(n = 17964)               | Has Primary Care<br>(n = 43766) |
|                                                  | <b>% (95% confidence interval)<sup>b</sup></b> |                                 |                                              |                                 |
| <b>ADL HELP<sup>c</sup></b>                      | 1 (1,1)                                        | 3 (3,4)                         | 4 (3,5)                                      | 3 (2,3)                         |
| <b>iADL HELP<sup>c</sup></b>                     | 2 (2,2)                                        | 6 (6,6)                         | 7 (5,8)                                      | 5 (5,5)                         |
| <b>FAMILY INCOME AS % OF POVERTY LINE</b>        |                                                |                                 |                                              |                                 |
| Poor/Negative (<100%)                            | 18 (17,19)                                     | 11 (10,12)                      | 14 (13,16)                                   | 13 (12,14)                      |
| Near poor (100%-124%)                            | 5 (5,6)                                        | 4 (4,4)                         | 5 (4,5)                                      | 5 (4,5)                         |
| Low income (125%-199%)                           | 18 (17,18)                                     | 13 (12,13)                      | 13 (12,14)                                   | 14 (13,14)                      |
| Middle income (200%-399%)                        | 31 (30,32)                                     | 29 (28,30)                      | 28 (27,30)                                   | 30 (29,30)                      |
| High income (>=400%)                             | 28 (26,29)                                     | 43 (42,44)                      | 40 (37,43)                                   | 40 (38,41)                      |
| <b>SF-12 PHYSICAL COMPONENT SUMMARY</b>          | 53 (52,53)                                     | 48 (48,49)                      | 49 (48,50)                                   | 49 (49,50)                      |
| <b>SF-12 MENTAL COMPONENT SUMMARY</b>            | 52 (52,52)                                     | 51 (51,52)                      | 51 (51,52)                                   | 52 (51,52)                      |
| <b>Chronic diseases, mean number<sup>d</sup></b> | 0.4 (0.3,0.4)                                  | 1.4 (1.4,1.4)                   | 1.3 (1.1,1.4)                                | 1.2 (1.1,1.2)                   |
| <b>CHRONIC DISEASE</b>                           |                                                |                                 |                                              |                                 |
| Hypertension                                     | 8 (8,9)                                        | 34 (33,35)                      | 28 (25,31)                                   | 28 (27,29)                      |
| Hyperlipidemia                                   | 6 (5,6)                                        | 28 (27,29)                      | 22 (19,25)                                   | 23 (22,24)                      |
| Diabetes                                         | 3 (2,3)                                        | 13 (13,14)                      | 11 (9,13)                                    | 11 (10,11)                      |
| Chronic obstructive pulmonary disease            | 3 (2,3)                                        | 7 (7,7)                         | 6 (5,8)                                      | 6 (5,6)                         |
| CAD/MI                                           | 2 (1,2)                                        | 8 (8,9)                         | 8 (6,9)                                      | 7 (6,7)                         |
| Cancer <sup>e</sup>                              | 2 (1,2)                                        | 8 (7,8)                         | 7 (5,8)                                      | 7 (6,7)                         |
| Asthma                                           | 3 (2,3)                                        | 7 (7,8)                         | 7 (5,8)                                      | 6 (6,7)                         |
| Arthritis                                        | 3 (2,3)                                        | 11 (11,12)                      | 12 (10,14)                                   | 9 (9,10)                        |

<sup>a</sup> Propensity score weighting adjusted for all variables in **Table 1** and activities of daily living, instrumental activities of daily living, family income as a percent of the poverty line, and the physical and mental components of the short form 12.

<sup>b</sup> Percents weighted to be nationally representative and account for non-response. Percents may not sum to 100 due to rounding.

<sup>c</sup> Three-part screener question to determine if respondent required assistance with ADLs or iADLs

<sup>d</sup> Out of the 20 conditions considered chronic by the Health and Human Services Office of the Assistant Secretary of Health.<sup>32</sup> Select conditions shown.

<sup>e</sup> All, except non-melanoma skin cancer.

**Abbreviations:** ADLs: activities of daily living; CAD/MI: coronary artery disease / myocardial infarction; COPD: chronic obstructive pulmonary disease; iADLs: instrumental activities of daily living; SF: short form

**eTable 3.** Propensity-Score Weighted Outpatient Quality and Experience for Patients With Primary Care Versus Those Without Primary Care and No Outpatient Visit, 2012-2014

| Measure or Composite                                          | No Primary Care and No Outpatient Visit (n = 3069) |               | Has Primary Care (n = 43766) |               | Difference <sup>a</sup> |
|---------------------------------------------------------------|----------------------------------------------------|---------------|------------------------------|---------------|-------------------------|
|                                                               | n                                                  | Mean (95% CI) | n                            | Mean (95% CI) |                         |
| <b>High-Value Cancer Screening Composite</b>                  | 1279                                               | 47 (42,52)    | 28750                        | 78 (77,79)    | <b>31.6 (26.5,36.7)</b> |
| Cervical cancer screening                                     | 892                                                | 66 (59,72)    | 15756                        | 89 (88,90)    | <b>23.1 (17.1,29.2)</b> |
| Breast cancer screening                                       | 184                                                | 42 (28,56)    | 9632                         | 80 (79,81)    | <b>38.3 (24.2,52.4)</b> |
| Colorectal cancer screening                                   | 520                                                | 26 (18,34)    | 17860                        | 66 (65,68)    | <b>40.6 (32.8,48.5)</b> |
| <b>High-Value Diagnostic and Preventive Testing Composite</b> | 3048                                               | 57 (55,60)    | 43699                        | 80 (79,81)    | <b>22.8 (20.2,25.4)</b> |
| Dental checkup                                                | 3032                                               | 42 (38,46)    | 43605                        | 65 (64,66)    | <b>22.9 (18.5,27.3)</b> |
| Blood pressure measurement                                    | 2940                                               | 68 (64,72)    | 43274                        | 95 (94,95)    | <b>26.6 (23.1,30.2)</b> |
| Cholesterol measurement                                       | 1436                                               | 82 (78,87)    | 31975                        | 96 (96,96)    | <b>13.8 (9.4,18.2)</b>  |
| Influenza vaccine                                             | 547                                                | 28 (16,40)    | 21331                        | 60 (59,62)    | <b>32.2 (19.7,44.6)</b> |
| <b>High-Value Diabetes Care Composite</b>                     | 39                                                 | 30 (8,51)     | 5419                         | 71 (70,73)    | <b>41.1 (19.4,62.8)</b> |
| A1c measurement                                               | 28                                                 | 49 (9,89)     | 3614                         | 79 (77,81)    | 28.7 (-11.5,68.9)       |
| Foot exam                                                     | 38                                                 | 35 (0,69)     | 5319                         | 73 (71,74)    | <b>37.6 (2.8,72.4)</b>  |
| Eye exam                                                      | 39                                                 | 19 (0,39)     | 5367                         | 67 (65,68)    | <b>46.7 (27.3,66)</b>   |
| <b>High-Value Counseling Composite</b>                        | 2074                                               | 32 (27,37)    | 31533                        | 52 (51,53)    | <b>19.8 (14.4,25.2)</b> |
| Weight loss counseling                                        | 1927                                               | 28 (22,34)    | 29551                        | 46 (44,47)    | <b>17.6 (11.9,23.4)</b> |
| Exercise counseling                                           | 1926                                               | 34 (28,40)    | 29584                        | 53 (52,55)    | <b>19.5 (13.8,25.2)</b> |
| Smoking cessation counseling                                  | 322                                                | 33 (24,42)    | 5654                         | 68 (66,70)    | <b>35.1 (25.7,44.5)</b> |
| <b>High-Value Medical Treatment Composite</b>                 | 99                                                 | 16 (7,24)     | 17307                        | 43 (42,44)    | <b>26.9 (18,35.8)</b>   |
| Anticoagulation for atrial fibrillation                       | 7                                                  | 0 (0,0)       | 1339                         | 36 (32,39)    | *                       |
| ACEi/ARB for heart failure                                    | 1                                                  | *             | 372                          | 65 (56,75)    | *                       |
| Beta blocker for heart failure                                | 1                                                  | *             | 372                          | 67 (58,76)    | *                       |
| Salicylates and/or platelet aggregation inhibitors for CAD/MI | 11                                                 | 10 (-8,28)    | 3403                         | 30 (28,33)    | <b>20.6 (2.5,38.8)</b>  |
| Beta blocker for CAD/MI                                       | 11                                                 | 65 (27,102)   | 3403                         | 60 (57,62)    | -5 (-42,32)             |
| Statin for CAD/MI                                             | 11                                                 | 52 (8,96)     | 3403                         | 64 (62,67)    | 12.3 (-31.1,55.6)       |
| Statin for dyslipidemia                                       | 42                                                 | 44 (22,66)    | 11633                        | 73 (72,75)    | <b>29.2 (7.4,51)</b>    |
| ACEi/ARB for diabetes & hypertension                          | 12                                                 | 24 (-4,51)    | 4841                         | 60 (58,63)    | <b>36.6 (9.1,64.1)</b>  |
| Statin for CVA                                                | 3                                                  | 89 (65,113)   | 882                          | 57 (52,62)    | *                       |
| Antiplatelet for CVA                                          | 3                                                  | 0 (0,0)       | 882                          | 34 (29,38)    | *                       |
| Controller medication for poorly controlled asthma            | 3                                                  | 0 (0,0)       | 579                          | 59 (53,64)    | *                       |
| Controller medication for poorly controlled COPD              | 3                                                  | 0 (0,0)       | 555                          | 34 (29,39)    | *                       |
| <b>Low-Value Cancer Screening Composite</b>                   | 41                                                 | 75 (-14,164)  | 6046                         | 49 (47,51)    | -26.3 (-115.4,62.8)     |
| Cervical cancer screening in older adults                     | 32                                                 | 42 (-4,88)    | 4602                         | 48 (45,50)    | 5.8 (-39.9,51.5)        |
| Colorectal cancer screening in older adults                   | 19                                                 | 11 (-6,27)    | 3240                         | 39 (37,42)    | <b>28.6 (11.7,45.5)</b> |
| Prostate cancer screening in older adults                     | 8                                                  | 36 (-7,79)    | 1243                         | 71 (67,74)    | *                       |

|                                                              |     |            |       |            |                        |
|--------------------------------------------------------------|-----|------------|-------|------------|------------------------|
| Low-Value Antibiotic Use Composite                           | 0   | *          | 3027  | 59 (57,62) | *                      |
| Antibiotics for acute upper respiratory infection            | 0   | *          | 2426  | 64 (62,67) | *                      |
| Antibiotics for influenza                                    | 0   | *          | 652   | 37 (32,42) | *                      |
| Low-Value Medical Treatment Composite                        | 219 | 4 (-1,8)   | 21329 | 11 (10,11) | <b>7.2 (2.7,11.7)</b>  |
| Anxiolytics, sedatives, & hypnotics in the elderly           | 78  | 0 (0,0)    | 8490  | 9 (8,10)   | *                      |
| Benzodiazepine for depression                                | 87  | 1 (-1,2)   | 4733  | 10 (9,11)  | <b>9.6 (7.8,11.3)</b>  |
| Opioid for headache                                          | 0   | *          | 676   | 1 (0,2)    | *                      |
| Opioid for back pain                                         | 0   | *          | 2902  | 6 (5,7)    | *                      |
| NSAID use for hypertension, heart failure, or kidney disease | 105 | 9 (-3,21)  | 15122 | 15 (14,16) | 5.7 (-6.5,17.8)        |
| Low-Value Imaging Composite                                  | 0   | *          | 3489  | 10 (9,11)  | *                      |
| MRI/CT for back pain                                         | 0   | *          | 2902  | 7 (6,8)    | *                      |
| X-ray for back pain                                          | 0   | *          | 2902  | 13 (11,14) | *                      |
| MRI/CT for headache                                          | 0   | *          | 676   | 9 (6,12)   | *                      |
| Respondent Experience: Global Rating of Health Care          | 375 | 65 (51,79) | 32120 | 79 (78,80) | <b>14.4 (0.7,28.2)</b> |
| Respondent Experience: Doctor Communication Composite        | 390 | 56 (43,69) | 32433 | 64 (64,65) | 8.3 (-4.7,21.3)        |
| Doctor listened to you                                       | 383 | 57 (45,70) | 32139 | 66 (65,67) | 9.1 (-3.5,21.6)        |
| Doctor explained so you understood                           | 389 | 59 (45,73) | 32362 | 66 (65,67) | 6.5 (-7.2,20.3)        |
| Doctor showed respect                                        | 382 | 61 (47,74) | 32323 | 70 (69,70) | 8.8 (-4.9,22.5)        |
| Doctor spent enough time with you                            | 385 | 48 (34,62) | 32309 | 57 (56,58) | 8.7 (-5.5,22.9)        |
| Respondent Experience: Access to Care Composite              | 479 | 55 (43,66) | 31240 | 59 (58,60) | 4.0 (-7.5,15.5)        |
| Got care when ill or injured as soon as wanted               | 248 | 56 (36,76) | 12561 | 64 (63,66) | 8.5 (-11.2,28.1)       |
| Got medical appointment as soon as wanted                    | 292 | 51 (40,62) | 29221 | 58 (57,59) | 7.1 (-4.1,18.4)        |

<sup>a</sup>: Positive difference: respondents with primary care received more (high- or low-value) care or had better experience. Negative difference: respondents without primary care received more (high- or low-value) care or had better experience.

\*: insufficient sample size

**Bold** indicates p<0.05.



**eTable 4.** Health Care Utilization With and Without Primary Care Without Propensity Score Weighting, 2012-2014

|                                                                  | <b>No Primary Care<br/>(n = 21133)</b> | <b>Has Primary Care<br/>(n = 49286)</b> | <b>Difference<sup>a</sup></b> |
|------------------------------------------------------------------|----------------------------------------|-----------------------------------------|-------------------------------|
| <b>ENCOUNTERS</b> , mean # per year (95% CI)                     |                                        |                                         |                               |
| Office visits                                                    | 2.4 (2.2,2.6)                          | 7.5 (7.3,7.7)                           | <b>5.1 (4.8,5.3)</b>          |
| Emergency department visits                                      | 0.2 (0.1,0.2)                          | 0.2 (0.2,0.2)                           | <b>0.1 (0.1,0.1)</b>          |
| Hospital admissions                                              | 0.1 (0.0,0.1)                          | 0.1 (0.1,0.1)                           | <b>0.1 (0.1,0.1)</b>          |
| <b>PRESCRIBED MEDICINES</b> , mean total fills per year (95% CI) | 3.3 (3.0,3.6)                          | 16.4 (16.0,16.9)                        | <b>13.1 (12.7,13.6)</b>       |
| <b>PREVENTIVE VISIT</b> within past year, mean % (95% CI)        | 40.0 (38.6,41.5)                       | 76.7 (75.9,77.5)                        | <b>36.7 (35.1,38.3)</b>       |

<sup>a</sup>: Positive difference: respondents with primary care had more utilization. Negative difference: respondents without primary had more utilization.

**Note:** Health care utilization with propensity score weighting in **Table 2** and for 2002-2004 in **eTable 8**. **Bold** indicates p<0.05.

**eTable 5.** Outpatient Quality and Experience With and Without Primary Care Without Propensity Score Weighting, 2012-2014

| Measure or Composite                                          | No Primary Care<br>(n = 21133) |                     | Has Primary Care<br>(n = 49286) |                     | Difference <sup>a</sup>           |
|---------------------------------------------------------------|--------------------------------|---------------------|---------------------------------|---------------------|-----------------------------------|
|                                                               | n                              | Mean (95%<br>CI)    | n                               | Mean (95%<br>CI)    |                                   |
| High-Value Cancer Screening Composite                         | 9931                           | 62.9<br>(61.2,64.7) | 31521                           | 78.8<br>(77.9,79.6) | <b>15.8</b><br><b>(14.0,17.7)</b> |
| Cervical cancer screening                                     | 7125                           | 78.8<br>(77.2,80.4) | 17209                           | 89.4<br>(88.5,90.3) | <b>10.6 (8.9,12.3)</b>            |
| Breast cancer screening                                       | 1682                           | 52.5<br>(48.5,56.6) | 10574                           | 81.1<br>(80.0,82.3) | <b>28.6</b><br><b>(24.6,32.6)</b> |
| Colorectal cancer screening                                   | 3886                           | 32.5<br>(29.9,35.1) | 19614                           | 68.1<br>(66.9,69.4) | <b>35.6</b><br><b>(32.8,38.4)</b> |
| High-Value Diagnostic and Preventive Testing Composite        | 20842                          | 61.7<br>(60.7,62.8) | 48913                           | 81.8<br>(81.3,82.3) | <b>20.1</b><br><b>(19.0,21.1)</b> |
| Dental checkup                                                | 20751                          | 46.8<br>(45.2,48.3) | 48759                           | 66.7<br>(65.7,67.7) | <b>20.0</b><br><b>(18.3,21.6)</b> |
| Blood pressure measurement                                    | 20061                          | 74.8<br>(73.5,76.1) | 48261                           | 96.2<br>(95.9,96.4) | <b>21.4</b><br><b>(20.1,22.6)</b> |
| Cholesterol measurement                                       | 9948                           | 83.9<br>(82.6,85.1) | 35239                           | 97.0<br>(96.8,97.3) | <b>13.2</b><br><b>(11.9,14.4)</b> |
| Influenza vaccine                                             | 4204                           | 30.3<br>(28.0,32.6) | 23565                           | 62.6<br>(61.3,63.9) | <b>32.3</b><br><b>(29.8,34.7)</b> |
| High-Value Diabetes Care Composite                            | 554                            | 44.9<br>(39.9,49.9) | 5832                            | 71.5<br>(70.2,72.7) | <b>26.6</b><br><b>(21.6,31.5)</b> |
| A1c measurement                                               | 339                            | 46.4<br>(38.3,54.6) | 3850                            | 78.6<br>(76.7,80.5) | <b>32.1</b><br><b>(24.1,40.2)</b> |
| Foot exam                                                     | 542                            | 44.8<br>(38.2,51.4) | 5722                            | 72.9<br>(71.3,74.5) | <b>28.1</b><br><b>(21.1,35.1)</b> |
| Eye exam                                                      | 547                            | 43.5<br>(37.4,49.5) | 5770                            | 66.9<br>(65.0,68.7) | <b>23.4</b><br><b>(17.4,29.4)</b> |
| High-Value Counseling Composite                               | 13629                          | 30.4<br>(29.2,31.7) | 34490                           | 54.5<br>(53.5,55.4) | <b>24 (22.5,25.5)</b>             |
| Weight loss counseling                                        | 12589                          | 25.6<br>(24.2,26.9) | 32254                           | 48.9<br>(47.8,50.0) | <b>23.3</b><br><b>(21.6,25.1)</b> |
| Exercise counseling                                           | 12597                          | 32.2<br>(30.7,33.6) | 32287                           | 56.6<br>(55.6,57.6) | <b>24.4 (22.8,26)</b>             |
| Smoking cessation counseling                                  | 2420                           | 41.7<br>(38.9,44.6) | 6116                            | 70.1<br>(68.4,71.8) | <b>28.4</b><br><b>(25.4,31.4)</b> |
| High-Value Medical Treatment Composite                        | 1859                           | 29.4<br>(26.6,32.2) | 19278                           | 43.0<br>(42.1,43.9) | <b>13.6</b><br><b>(10.8,16.4)</b> |
| Anticoagulation for atrial fibrillation                       | 132                            | 21.7<br>(11.3,32.2) | 1472                            | 36.7<br>(33.3,40.1) | <b>15.0 (8.5,21.4)</b>            |
| ACEi/ARB for heart failure                                    | 34                             | 75.2<br>(60.9,89.6) | 419                             | 62.2<br>(54.4,70.1) | <b>-13.0 (-20.3,-5.7)</b>         |
| Beta blocker for heart failure                                | 34                             | 71.6<br>(53.8,89.3) | 419                             | 67.2<br>(59.5,74.9) | <b>-4.4 (-13.2,4.4)</b>           |
| Salicylates and/or platelet aggregation inhibitors for CAD/MI | 290                            | 27.7<br>(19.3,36.2) | 3828                            | 30.8<br>(28.5,33.1) | <b>3.0 (-5.5,11.6)</b>            |
| Beta blocker for CAD/MI                                       | 290                            | 50.9<br>(42.0,59.9) | 3828                            | 59.3<br>(57.0,61.7) | <b>8.4 (-0.8,17.6)</b>            |
| Statin for CAD/MI                                             | 290                            | 51.2<br>(42.0,60.3) | 3828                            | 64.5<br>(62.4,66.7) | <b>13.4 (4.0,22.7)</b>            |

|                                                              |      |                     |       |                     |                                   |
|--------------------------------------------------------------|------|---------------------|-------|---------------------|-----------------------------------|
| Statin for dyslipidemia                                      | 990  | 54.7<br>(50.1,59.3) | 12862 | 73.6<br>(72.3,74.8) | <b>18.9</b><br><b>(14.5,23.3)</b> |
| ACEi/ARB for diabetes & hypertension                         | 357  | 53.7<br>(46.8,60.6) | 5452  | 59.9<br>(57.5,62.2) | 6.1 (-1.1,13.4)                   |
| Statin for CVA                                               | 83   | 44.4<br>(29.3,59.4) | 1017  | 56.5<br>(51.7,61.2) | <b>12.1 (4.2,20.0)</b>            |
| Antiplatelet for CVA                                         | 83   | 23.8<br>(10.0,37.6) | 1017  | 33.8<br>(29.6,37.9) | <b>10.0 (4.5,15.5)</b>            |
| Controller medication for poorly controlled asthma           | 53   | 47.1<br>(27.8,66.5) | 627   | 59.2<br>(53.7,64.6) | <b>12.0 (7.4,16.6)</b>            |
| Controller medication for poorly controlled COPD             | 56   | 31.5<br>(14.2,48.8) | 608   | 35.7<br>(30.7,40.6) | 4.2 (-0.6,9.0)                    |
| Low-Value Cancer Screening Composite                         | 503  | 34.0<br>(28.9,39.1) | 6705  | 48.5<br>(46.7,50.4) | <b>14.6 (9.6,19.5)</b>            |
| Cervical cancer screening in older adults                    | 376  | 33.7<br>(28.1,39.4) | 5085  | 48.2<br>(45.9,50.5) | <b>14.5 (8.9,20.1)</b>            |
| Colorectal cancer screening in older adults                  | 254  | 24.7<br>(17.6,31.8) | 3618  | 38.9<br>(36.3,41.4) | <b>14.2 (6.8,21.5)</b>            |
| Prostate cancer screening in older adults                    | 101  | 52.8<br>(39.3,66.3) | 1376  | 70.6<br>(67.6,73.7) | <b>17.8</b><br><b>(13.4,22.3)</b> |
| Low-Value Antibiotic Use Composite                           | 497  | 49.9<br>(44.3,55.5) | 3296  | 58.6<br>(56.3,61.0) | <b>8.7 (2.6,14.8)</b>             |
| Antibiotics for acute upper respiratory infection            | 351  | 59.2<br>(52.3,66.2) | 2637  | 64.0<br>(61.5,66.6) | 4.8 (-2.8,12.4)                   |
| Antibiotics for influenza                                    | 152  | 27.4<br>(18.1,36.8) | 715   | 34.8<br>(30.0,39.6) | <b>7.3 (6.3,8.3)</b>              |
| Low-Value Medical Treatment Composite                        | 3126 | 10.8<br>(10.3,11.3) | 23688 | 7.5 (6.3,8.7)       | <b>3.4 (2.1,4.6)</b>              |
| Anxiolytics, sedatives, & hypnotics in the elderly           | 801  | 9.1 (8.1,10.0)      | 9589  | 3.6 (1.8,5.3)       | <b>5.5 (3.6,7.4)</b>              |
| Benzodiazepine for depression                                | 938  | 10.6<br>(9.3,11.9)  | 5159  | 6.1 (3.8,8.4)       | <b>4.5 (1.9,7.1)</b>              |
| Opioid for headache                                          | 95   | 0.8 (0.2,1.5)       | 746   | 1.9 (-0.7,4.5)      | <b>-1.1 (-1.3,-0.9)</b>           |
| Opioid for back pain                                         | 478  | 5.9 (4.8,7.0)       | 3146  | 5.3 (3.0,7.7)       | 0.6 (-1.9,3.0)                    |
| NSAID use for hypertension, heart failure, or kidney disease | 1707 | 14.5<br>(13.6,15.3) | 16830 | 11.8<br>(9.7,13.9)  | <b>2.7 (0.5,4.8)</b>              |
| Low-Value Imaging Composite                                  |      | 9.9 (8.9,10.8)      | 3795  | 11.3<br>(8.9,13.7)  | -1.5 (-4.0,1.1)                   |
| MRI/CT for back pain                                         | 478  | 6.9 (5.8,8.0)       | 3146  | 7.5 (4.3,10.8)      | -0.6 (-4.1,2.8)                   |
| X-ray for back pain                                          | 478  | 12.8<br>(11.4,14.3) | 3146  | 17.5<br>(13.4,21.5) | <b>-4.6 (-8.9,-0.3)</b>           |
| MRI/CT for headache                                          | 95   | 10.0<br>(7.3,12.7)  | 746   | 5.0 (1.0,9.1)       | <b>5.0 (3.6,6.4)</b>              |
| Respondent Experience: Global Rating of Health Care          | 6066 | 67.8<br>(65.9,69.6) | 33770 | 79.9<br>(79.2,80.6) | <b>12.2</b><br><b>(10.3,14.0)</b> |
| Respondent Experience: Doctor Communication Composite        | 6214 | 56.1<br>(54.4,57.8) | 34138 | 64.8<br>(64.1,65.6) | <b>8.7 (7.0,10.4)</b>             |
| Doctor listened to you                                       | 6093 | 56.3<br>(54.4,58.3) | 33795 | 66.5<br>(65.7,67.3) | <b>10.1 (8.2,12.1)</b>            |
| Doctor explained so you understood                           | 6180 | 58.4<br>(56.7,60.1) | 34041 | 65.9<br>(65.1,66.8) | <b>7.6 (5.7,9.4)</b>              |
| Doctor showed respect                                        | 6156 | 61.6<br>(59.7,63.4) | 33997 | 69.9<br>(69.1,70.7) | <b>8.3 (6.5,10.2)</b>             |
| Doctor spent enough time with you                            | 6154 | 48.6<br>(46.6,50.6) | 33971 | 57.1<br>(56.2,58.1) | <b>8.6 (6.6,10.5)</b>             |

|                                                 |      |                     |       |                     |                             |
|-------------------------------------------------|------|---------------------|-------|---------------------|-----------------------------|
| Respondent Experience: Access to Care Composite | 6510 | 48.3<br>(46.6,50.0) | 32864 | 60.0<br>(59.2,60.8) | <b>11.7 (9.8,13.5)</b>      |
| Got care when ill or injured as soon as wanted  | 3112 | 49.0<br>(46.5,51.6) | 13367 | 65.6<br>(64.4,66.9) | <b>16.6<br/>(13.9,19.3)</b> |
| Got medical appointment as soon as wanted       | 5049 | 47.9<br>(46.0,49.8) | 30728 | 58.7<br>(57.8,59.6) | <b>10.8 (8.7,12.9)</b>      |

<sup>a</sup>: Positive difference: respondents with primary care received more (high- or low-value) care or had better experience. Negative difference: respondents without primary care received more (high- or low-value) care or had better experience.

**Bold** indicates  $p < 0.05$ .

**eTable 6.** Characteristics of the Medical Expenditure Panel Survey Respondents With and Without Primary Care, 2002-2004

|                                                   | Without propensity score weighting             |                                 | With propensity score weighting <sup>a</sup> |                                 |
|---------------------------------------------------|------------------------------------------------|---------------------------------|----------------------------------------------|---------------------------------|
|                                                   | No Primary Care<br>(n = 17488)                 | Has Primary Care<br>(n = 49812) | No Primary Care<br>(n = 14758)               | Has Primary Care<br>(n = 44201) |
| <b>AGE</b> , mean years (95% confidence interval) | 37.1<br>(36.8,37.5)                            | 48.1 (47.8,48.5)                | 46.0<br>(44.9,47.2)                          | 45.7 (45.3,46.1)                |
|                                                   | <b>% (95% confidence interval)<sup>b</sup></b> |                                 |                                              |                                 |
| <b>FEMALE</b>                                     | 40 (39,41)                                     | 55 (55,56)                      | 54 (52,56)                                   | 52 (51,53)                      |
| <b>RACE/ETHNICITY</b>                             |                                                |                                 |                                              |                                 |
| Non-Hispanic White                                | 56 (54,59)                                     | 74 (73,76)                      | 73 (70,75)                                   | 72 (70,73)                      |
| Hispanic                                          | 23 (21,25)                                     | 9 (8,10)                        | 11 (10,12)                                   | 12 (10,13)                      |
| Non-Hispanic Black                                | 14 (12,15)                                     | 10 (9,11)                       | 11 (9,12)                                    | 11 (10,12)                      |
| Non-Hispanic Asian                                | 5 (4,6)                                        | 4 (3,4)                         | 4 (3,4)                                      | 4 (4,5)                         |
| Non-Hispanic Other or Multiple                    | 2 (2,3)                                        | 2 (2,2)                         | 2 (1,2)                                      | 2 (2,2)                         |
| <b>CENSUS REGION</b>                              |                                                |                                 |                                              |                                 |
| Northeast                                         | 13 (12,14)                                     | 21 (19,23)                      | 17 (15,19)                                   | 19 (17,20)                      |
| Midwest                                           | 20 (18,22)                                     | 23 (21,25)                      | 23 (21,26)                                   | 23 (21,25)                      |
| South                                             | 41 (38,44)                                     | 34 (32,36)                      | 36 (33,40)                                   | 36 (34,38)                      |
| West                                              | 26 (24,28)                                     | 22 (20,23)                      | 23 (20,25)                                   | 22 (20,24)                      |
| <b>PARTNER STATUS</b>                             |                                                |                                 |                                              |                                 |
| Married/partnered                                 | 44 (43,46)                                     | 59 (58,60)                      | 56 (54,59)                                   | 56 (55,57)                      |
| Never Married                                     | 39 (37,40)                                     | 20 (19,21)                      | 23 (22,25)                                   | 24 (23,25)                      |
| Divorced/separated                                | 14 (13,15)                                     | 12 (12,13)                      | 13 (12,15)                                   | 13 (13,14)                      |
| Widowed                                           | 3 (3,3)                                        | 8 (8,9)                         | 7 (5,9)                                      | 7 (7,7)                         |
| <b>EDUCATION</b>                                  |                                                |                                 |                                              |                                 |
| <High school                                      | 25 (24,27)                                     | 19 (18,20)                      | 19 (18,21)                                   | 19 (18,20)                      |
| High school/GED/some college                      | 54 (52,55)                                     | 55 (54,56)                      | 56 (54,58)                                   | 55 (54,56)                      |
| Bachelor's degree                                 | 14 (13,15)                                     | 15 (15,16)                      | 15 (14,17)                                   | 15 (15,16)                      |
| >Bachelor's                                       | 7 (6,8)                                        | 10 (10,11)                      | 10 (8,11)                                    | 10 (9,10)                       |
| <b>HEALTH INSURANCE COVERAGE</b>                  |                                                |                                 |                                              |                                 |
| Any private                                       | 57 (56,58)                                     | 78 (77,78)                      | 73 (70,75)                                   | 73 (72,74)                      |
| Public only                                       | 9 (9,10)                                       | 15 (14,16)                      | 15 (13,16)                                   | 14 (13,14)                      |
| Uninsured                                         | 34 (32,35)                                     | 7 (7,8)                         | 13 (12,14)                                   | 13 (12,14)                      |
| <b>PERCEIVED HEALTH STATUS</b>                    |                                                |                                 |                                              |                                 |
| Excellent                                         | 33 (32,34)                                     | 25 (25,26)                      | 27 (25,29)                                   | 27 (26,28)                      |
| Very good                                         | 33 (31,34)                                     | 33 (32,33)                      | 33 (31,35)                                   | 33 (32,34)                      |
| Good                                              | 26 (25,27)                                     | 27 (27,28)                      | 26 (24,28)                                   | 27 (26,27)                      |
| Fair                                              | 7 (6,7)                                        | 11 (10,11)                      | 10 (8,12)                                    | 10 (9,10)                       |
| Poor                                              | 2 (1,2)                                        | 4 (4,4)                         | 4 (3,6)                                      | 3 (3,4)                         |
| <b>EMPLOYED</b>                                   | 82 (82,83)                                     | 69 (68,70)                      | 71 (68,74)                                   | 73 (72,73)                      |
| <b>CURRENTLY SMOKE</b>                            | 26 (25,27)                                     | 19 (18,19)                      | 22 (21,24)                                   | 22 (21,23)                      |

|                                                       |                  |                  |                  |                  |
|-------------------------------------------------------|------------------|------------------|------------------|------------------|
| <b>FAMILY INCOME &lt;100% OF FEDERAL POVERTY LINE</b> | 16 (15,17)       | 10 (9,10)        | 11 (10,12)       | 11 (10,12)       |
| <b>BODY MASS INDEX, mean kg/m<sup>2</sup></b>         | 26.5 (26.4,26.6) | 27.3 (27.2,27.4) | 27.2 (26.7,27.7) | 27.1 (27.1,27.2) |
| <b>CHRONIC DISEASES<sup>c</sup></b>                   |                  |                  |                  |                  |
| 0                                                     | 83 (83,84)       | 51 (50,52)       | 58 (55,60)       | 58 (57,59)       |
| 1                                                     | 13 (12,13)       | 25 (24,26)       | 20 (19,21)       | 23 (22,23)       |
| 2                                                     | 3 (3,3)          | 13 (13,13)       | 11 (10,12)       | 11 (10,11)       |
| >=3                                                   | 1 (1,1)          | 11 (10,11)       | 11 (9,14)        | 9 (8,9)          |

<sup>a</sup> Propensity score weighting adjusted for all variables in **Table 1** and activities of daily living, instrumental activities of daily living, family income as a percent of the poverty line, and the physical and mental components of the short form 12.

<sup>b</sup> Percents weighted to be nationally representative and account for non-response. Percents may not sum to 100 due to rounding.

<sup>c</sup> Out of the 20 conditions considered chronic by the Health and Human Services Office of the Assistant Secretary of Health.<sup>32</sup> More detail available in **eTable 8**.

**Abbreviation:** GED, general educational development

**Note:** Additional characteristics available in **eTable 7**.

**eTable 7.** Additional Characteristics of the Medical Expenditure Panel Survey Respondents With and Without Primary Care, 2002-2004

|                                                  | Without propensity score weighting             |                                 | With propensity score weighting <sup>a</sup> |                                 |
|--------------------------------------------------|------------------------------------------------|---------------------------------|----------------------------------------------|---------------------------------|
|                                                  | No Primary Care<br>(n = 17488)                 | Has Primary Care<br>(n = 49812) | No Primary Care<br>(n = 14758)               | Has Primary Care<br>(n = 44201) |
|                                                  | <b>% (95% confidence interval)<sup>b</sup></b> |                                 |                                              |                                 |
| <b>ADL HELP<sup>c</sup></b>                      | 1 (1,1)                                        | 3 (3,3)                         | 4 (2,5)                                      | 2 (2,3)                         |
| <b>iADL HELP<sup>c</sup></b>                     | 2 (1,2)                                        | 6 (6,6)                         | 6 (4,8)                                      | 5 (4,5)                         |
| <b>FAMILY INCOME AS % OF POVERTY LINE</b>        |                                                |                                 |                                              |                                 |
| Poor/Negative (<100%)                            | 16 (15,17)                                     | 10 (9,10)                       | 11 (10,12)                                   | 11 (10,12)                      |
| Near poor (100%-124%)                            | 5 (5,6)                                        | 4 (4,4)                         | 4 (3,5)                                      | 4 (4,4)                         |
| Low income (125%-199%)                           | 17 (16,18)                                     | 12 (12,13)                      | 13 (12,14)                                   | 13 (12,14)                      |
| Middle income (200%-399%)                        | 32 (31,33)                                     | 31 (31,32)                      | 29 (28,31)                                   | 32 (31,32)                      |
| High income (>=400%)                             | 30 (28,31)                                     | 43 (42,44)                      | 42 (40,45)                                   | 40 (39,41)                      |
| <b>SF-12 PHYSICAL COMPONENT SUMMARY</b>          | 52.7<br>(52.5,52.9)                            | 48.6<br>(48.4,48.8)             | 49.2 (48.4,50)                               | 49.7<br>(49.5,49.9)             |
| <b>SF-12 MENTAL COMPONENT SUMMARY</b>            | 51.3<br>(51.1,51.5)                            | 50.9 (50.7,51)                  | 50.8<br>(50.3,51.3)                          | 51 (50.8,51.1)                  |
| <b>Chronic diseases, mean number<sup>d</sup></b> | 0.2 (0.2,0.2)                                  | 0.9 (0.9,0.9)                   | 0.8 (0.7,0.9)                                | 0.8 (0.7,0.8)                   |
| <b>CHRONIC DISEASE</b>                           |                                                |                                 |                                              |                                 |
| Hypertension                                     | 4 (4,5)                                        | 24 (23,24)                      | 17 (15,19)                                   | 20 (19,20)                      |
| Hyperlipidemia                                   | 2 (2,2)                                        | 14 (13,14)                      | 11 (9,13)                                    | 12 (11,12)                      |
| Depression                                       | 7 (7,8)                                        | 11 (10,11)                      | 14 (12,16)                                   | 10 (9,10)                       |
| Diabetes                                         | 2 (1,2)                                        | 9 (8,9)                         | 7 (5,9)                                      | 7 (7,8)                         |
| Chronic obstructive pulmonary disease            | 2 (2,2)                                        | 5 (5,6)                         | 5 (4,7)                                      | 5 (4,5)                         |
| CAD/MI                                           | 1 (1,1)                                        | 6 (5,6)                         | 5 (3,6)                                      | 4 (4,5)                         |
| Cancer <sup>e</sup>                              | 1 (1,2)                                        | 5 (5,6)                         | 5 (4,6)                                      | 4 (4,5)                         |
| Asthma                                           | 2 (2,2)                                        | 5 (5,5)                         | 5 (4,6)                                      | 4 (4,4)                         |
| Arthritis                                        | 0 (0,0)                                        | 2 (2,2)                         | 2 (1,3)                                      | 2 (1,2)                         |

<sup>a</sup> Propensity score weighting adjusted for all variables in **Table 1** and activities of daily living, instrumental activities of daily living, family income as a percent of the poverty line, and the physical and mental components of the short form 12.

<sup>b</sup> Percents weighted to be nationally representative and account for non-response. Percents may not sum to 100 due to rounding.

<sup>c</sup> Three-part screener question to determine if respondent required assistance with ADLs or iADLs

<sup>d</sup> Out of the 20 conditions considered chronic by the Health and Human Services Office of the Assistant Secretary of Health.<sup>32</sup> Select conditions shown.

<sup>e</sup> All, except non-melanoma skin cancer

**Abbreviations:** ADLs: activities of daily living; CAD/MI: coronary artery disease / myocardial infarction; COPD: chronic obstructive pulmonary disease; iADLs: instrumental activities of daily living; SF: short form

**eTable 8.** Health Care Utilization With and Without Primary Care, 2002-2004

|                                                                  | Without propensity score weighting |                                 |                         | With propensity score weighting <sup>a</sup> |                                 |                         |
|------------------------------------------------------------------|------------------------------------|---------------------------------|-------------------------|----------------------------------------------|---------------------------------|-------------------------|
|                                                                  | No Primary Care<br>(n = 17488)     | Has Primary Care<br>(n = 49812) | Difference <sup>b</sup> | No Primary Care<br>(n = 14758)               | Has Primary Care<br>(n = 44201) | Difference <sup>b</sup> |
| <b>ENCOUNTERS</b> , mean # per year (95% CI)                     |                                    |                                 |                         |                                              |                                 |                         |
| Office visits                                                    | 2.3<br>(2.2,2.5)                   | 7.0<br>(6.8,7.2)                | <b>4.6 (4.4,4.9)</b>    | 5.3<br>(4.4,6.1)                             | 6.3<br>(6.1,6.5)                | <b>1.0 (0.2,1.9)</b>    |
| Emergency department visits                                      | 0.1<br>(0.1,0.2)                   | 0.2<br>(0.2,0.2)                | <b>0.1 (0,0.1)</b>      | 0.2<br>(0.2,0.3)                             | 0.2<br>(0.2,0.2)                | 0.0 (-0.1,0.0)          |
| Hospital admissions                                              | 0.1<br>(0.0,0.1)                   | 0.1<br>(0.1,0.1)                | <b>0.1 (0.1,0.1)</b>    | 0.1<br>(0.1,0.1)                             | 0.1<br>(0.1,0.1)                | 0.0 (0.0,0.0)           |
| <b>PRESCRIBED MEDICINES</b> , mean total fills per year (95% CI) | 2.8<br>(2.6,3.0)                   | 15.0<br>(14.6,15.5)             | <b>12.2 (11.8,12.7)</b> | 9.2<br>(7.9,10.5)                            | 12.9<br>(12.5,13.3)             | <b>3.7 (2.4,5.0)</b>    |
| <b>PREVENTIVE VISIT</b> within past year, mean % (95% CI)        | 33.5<br>(32.3,34.7)                | 68.2<br>(67.3,69.2)             |                         | 47 (45,50)                                   | 64 (63,65)                      |                         |

<sup>a</sup>: Propensity score weighting adjusted for all variables in **Table 1** and activities of daily living, instrumental activities of daily living, family income as a percent of the poverty line, and the physical and mental components of the short form 12.

<sup>b</sup>: Positive difference: respondents with primary care had more utilization.

**Note:** Health care utilization for 2012-2014 in **Table 2**.  
**Bold** indicates p<0.05.



**eTable 9.** Propensity Score Weighted Outpatient Quality and Experience With and Without Primary Care, 2002-2004

| Measure or Composite                                          | No Primary Care<br>(n = 14758) |               | Has Primary Care<br>(n = 44201) |               | Difference <sup>a</sup>    |
|---------------------------------------------------------------|--------------------------------|---------------|---------------------------------|---------------|----------------------------|
|                                                               | n                              | Mean (95% CI) | n                               | Mean (95% CI) |                            |
| <b>High-Value Cancer Screening Composite</b>                  | 6726                           | 65 (62,67)    | 27550                           | 76 (75,76)    | <b>10.8 (8.2,13.3)</b>     |
| Cervical cancer screening                                     | 4951                           | 83 (81,85)    | 15561                           | 91 (91,92)    | <b>8.8 (6.9,10.7)</b>      |
| Breast cancer screening                                       | 1054                           | 66 (60,71)    | 8670                            | 83 (81,84)    | <b>17.1 (11.9,22.3)</b>    |
| Colorectal cancer screening                                   | 2426                           | 38 (33,43)    | 15897                           | 53 (51,54)    | <b>14.4 (9.1,19.6)</b>     |
| <b>High-Value Diagnostic and Preventive Testing Composite</b> | 14683                          | 68 (67,69)    | 44164                           | 78 (77,79)    | <b>9.8 (8.6,11.0)</b>      |
| Dental checkup                                                | 14631                          | 55 (52,57)    | 44094                           | 64 (63,65)    | <b>9.5 (7.2,11.8)</b>      |
| Blood pressure measurement                                    | 14215                          | 83 (82,84)    | 43711                           | 94 (93,94)    | <b>10.3 (9.1,11.6)</b>     |
| Cholesterol measurement                                       | 6947                           | 85 (84,86)    | 31942                           | 92 (92,93)    | <b>7.2 (5.8,8.6)</b>       |
| Influenza vaccine                                             | 2627                           | 40 (34,45)    | 19591                           | 50 (49,51)    | <b>10.2 (4.6,15.8)</b>     |
| <b>High-Value Diabetes Care Composite</b>                     | 232                            | 58 (45,71)    | 4135                            | 70 (68,71)    | 11.6 (-1.4,24.7)           |
| A1c measurement                                               | 189                            | 55 (35,75)    | 3212                            | 78 (76,80)    | <b>23.4 (3.7,43.0)</b>     |
| Foot exam                                                     | 225                            | 64 (51,76)    | 3973                            | 72 (70,74)    | 8.5 (-4.0,21.1)            |
| Eye exam                                                      | 229                            | 55 (39,71)    | 4095                            | 62 (60,65)    | 7.0 (-9.4,23.3)            |
| <b>High-Value Counseling Composite</b>                        | 10066                          | 36 (34,38)    | 31522                           | 47 (46,48)    | <b>10.8 (8.6,12.9)</b>     |
| Weight loss counseling                                        | 8755                           | 32 (30,35)    | 28251                           | 42 (41,43)    | <b>9.5 (6.9,12.0)</b>      |
| Exercise counseling                                           | 8758                           | 39 (36,41)    | 28249                           | 47 (47,48)    | <b>8.6 (6.0,11.3)</b>      |
| Smoking cessation counseling                                  | 2948                           | 41 (38,45)    | 8053                            | 59 (58,61)    | <b>17.7 (14.2,21.2)</b>    |
| <b>High-Value Medical Treatment Composite</b>                 | 830                            | 37 (32,42)    | 13641                           | 38 (37,38)    | 0.5 (-4.4,5.4)             |
| Anticoagulation for atrial fibrillation                       | 78                             | 27 (6,49)     | 1307                            | 32 (28,36)    | <b>4.7 (0.1,9.3)</b>       |
| ACEi/ARB for heart failure                                    | 13                             | 61 (-169,291) | 457                             | 65 (27,103)   | <b>4.0 (1.9,6.0)</b>       |
| Beta blocker for heart failure                                | 13                             | 33 (-176,241) | 457                             | 51 (2,100)    | <b>18.4 (16.5,20.3)</b>    |
| Salicylates and/or platelet aggregation inhibitors for CAD/MI | 138                            | 29 (16,42)    | 2540                            | 26 (23,28)    | -3.6 (-14.8,7.6)           |
| Beta blocker for CAD/MI                                       | 138                            | 59 (44,74)    | 2540                            | 55 (52,58)    | -4.2 (-17.0,8.6)           |
| Statin for CAD/MI                                             | 138                            | 50 (37,64)    | 2540                            | 58 (55,60)    | 7.3 (-3.4,18.1)            |
| Statin for dyslipidemia                                       | 273                            | 74 (64,84)    | 6041                            | 78 (76,79)    | 3.8 (-6.1,13.7)            |
| ACEi/ARB for diabetes & hypertension                          | 93                             | 75 (63,87)    | 2659                            | 64 (62,66)    | <b>-11.0 (-18.6,-3.3)</b>  |
| Statin for CVA                                                | 31                             | 24 (3,45)     | 627                             | 43 (38,49)    | *                          |
| Antiplatelet for CVA                                          | 31                             | 5 (-3,13)     | 627                             | 27 (22,31)    | *                          |
| Controller medication for poorly controlled asthma            | 26                             | 86 (74,98)    | 511                             | 75 (70,80)    | <b>-10.6 (-10.8,-10.3)</b> |
| Controller medication for poorly controlled COPD              | 18                             | 4 (-6,14)     | 384                             | 37 (31,43)    | *                          |
| <b>Low-Value Cancer Screening Composite</b>                   | 401                            | 39 (28,49)    | 6260                            | 53 (52,55)    | <b>14.7 (4.2,25.1)</b>     |
| Cervical cancer screening in older adults                     | 305                            | 43 (31,55)    | 4815                            | 61 (59,63)    | <b>18.1 (5.9,30.2)</b>     |
| Colorectal cancer screening in older adults                   | 196                            | 23 (11,35)    | 3613                            | 32 (29,34)    | 9.0 (-3.0,21.0)            |
| Prostate cancer screening in older adults                     | 82                             | 51 (23,79)    | 1256                            | 72 (69,75)    | <b>21.7 (21.1,22.3)</b>    |
| <b>Low-Value Antibiotic Use Composite</b>                     | 406                            | 50 (38,63)    | 3898                            | 56 (54,58)    | <b>5.6 (-6.9,18.1)</b>     |
| Antibiotics for acute upper respiratory infection             | 357                            | 51 (38,65)    | 3499                            | 58 (55,60)    | 6.0 (-7.9,20.0)            |

|                                                              |           |            |       |            |                            |
|--------------------------------------------------------------|-----------|------------|-------|------------|----------------------------|
| Antibiotics for influenza                                    | 53        | 43 (23,63) | 435   | 42 (36,48) | *                          |
| Low-Value Medical Treatment Composite                        | 2078      | 6 (4,9)    | 19764 | 8 (8,9)    | 2.0 (-0.6,4.5)             |
| Anxiolytics, sedatives, & hypnotics in the elderly           | 6 (1,11)  | 599        | 8346  | 7 (6,8)    | 0.9 (-4.3,6.1)             |
| Benzodiazepine for depression                                | 6 (0,12)  | 736        | 4593  | 9 (8,11)   | 3.6 (-2.6,9.8)             |
| Opioid for headache                                          | 2 (-1,5)  | 75         | 818   | 1 (0,2)    | <b>-0.9 (-1.0,-0.9)</b>    |
| Opioid for back pain                                         | 1 (0,2)   | 418        | 3258  | 3 (2,4)    | <b>1.8 (0.5,3.1)</b>       |
| NSAID use for hypertension, heart failure, or kidney disease | 10 (6,14) | 699        | 11293 | 13 (12,14) | 2.9 (-1.2,7.0)             |
| Low-Value Imaging Composite                                  | 485       | 16 (10,22) | 3967  | 14 (13,15) | -4.8 (-10.9,1.3)           |
| MRI/CT for back pain                                         | 418       | 7 (2,13)   | 3258  | 6 (5,7)    | -1.3 (-7.0,4.4)            |
| X-ray for back pain                                          | 418       | 23 (11,35) | 3258  | 17 (15,19) | -6.0 (-18.0,6.1)           |
| MRI/CT for headache                                          | 75        | 21 (2,41)  | 818   | 9 (7,11)   | <b>-12.5 (-13.7,-11.2)</b> |
| <hr/>                                                        |           |            |       |            |                            |
| Respondent Experience: Global Rating of Health Care          | 5463      | 67 (64,70) | 34711 | 75 (74,75) | <b>7.6 (4.8,10.5)</b>      |
| Respondent Experience: Doctor Communication Composite        | 5529      | 48 (46,51) | 34901 | 58 (57,58) | <b>9.3 (6.5,12.1)</b>      |
| Doctor listened to you                                       | 5452      | 46 (43,50) | 34663 | 59 (58,60) | <b>12.5 (9.3,15.6)</b>     |
| Doctor explained so you understood                           | 5475      | 53 (50,56) | 34778 | 60 (60,61) | <b>7.5 (4.3,10.8)</b>      |
| Doctor showed respect                                        | 5487      | 52 (49,55) | 34804 | 62 (61,63) | <b>10.1 (6.9,13.3)</b>     |
| Doctor spent enough time with you                            | 5484      | 42 (39,45) | 34768 | 49 (48,50) | <b>7.3 (4.0,10.6)</b>      |
| Respondent Experience: Access to Care Composite              | 5822      | 46 (43,48) | 33322 | 51 (50,52) | <b>5.3 (2.6,8.0)</b>       |
| Got care when ill or injured as soon as wanted               | 2847      | 56 (52,59) | 14046 | 60 (59,61) | <b>4.6 (1.0,8.1)</b>       |
| Got medical appointment as soon as wanted                    | 4645      | 43 (39,46) | 31015 | 48 (48,49) | <b>5.8 (2.2,9.3)</b>       |

<sup>a</sup>: Positive difference: respondents with primary care received more (high- or low-value) care or had better experience. Negative difference: respondents without primary care received more (high- or low-value) care or had better experience.

\*: insufficient sample size

**Bold** indicates  $p < 0.05$ .

**eTable 10.** Outpatient Quality and Experience Without Propensity Score Weighting With and Without Primary Care, 2002-2004

| Measure or Composite                                          | No Primary Care<br>(n = 17488) |               | Has Primary Care<br>(n = 49812) |               | Difference <sup>a</sup> |
|---------------------------------------------------------------|--------------------------------|---------------|---------------------------------|---------------|-------------------------|
|                                                               | n                              | Mean (95% CI) | n                               | Mean (95% CI) |                         |
| <b>High-Value Cancer Screening Composite</b>                  | 7720                           | 62 (60,63)    | 30415                           | 75 (75,76)    | <b>13.8 (12.1,15.5)</b> |
| Cervical cancer screening                                     | 5656                           | 79 (77,81)    | 17207                           | 92 (91,93)    | <b>13.1 (11.5,14.6)</b> |
| Breast cancer screening                                       | 1220                           | 51 (48,55)    | 9616                            | 83 (82,84)    | <b>32.0 (28.4,35.6)</b> |
| Colorectal cancer screening                                   | 2829                           | 23 (21,25)    | 17581                           | 53 (52,55)    | <b>30.6 (27.9,33.3)</b> |
| <b>High-Value Diagnostic and Preventive Testing Composite</b> | 17292                          | 60 (59,61)    | 49489                           | 80 (79,80)    | <b>19.9 (19.0,20.8)</b> |
| Dental checkup                                                | 17201                          | 47 (45,48)    | 49362                           | 66 (65,67)    | <b>19.1 (17.8,20.5)</b> |
| Blood pressure measurement                                    | 16595                          | 73 (72,74)    | 48851                           | 95 (95,95)    | <b>21.7 (20.6,22.9)</b> |
| Cholesterol measurement                                       | 8074                           | 74 (73,76)    | 35291                           | 94 (93,94)    | <b>19.3 (18.0,20.6)</b> |
| Influenza vaccine                                             | 3072                           | 22 (20,24)    | 21714                           | 52 (50,53)    | <b>29.6 (27.2,31.9)</b> |
| <b>High-Value Diabetes Care Composite</b>                     | 263                            | 46 (39,52)    | 4432                            | 70 (69,72)    | <b>24.4 (17.5,31.3)</b> |
| A1c measurement                                               | 212                            | 48 (40,56)    | 3437                            | 78 (77,80)    | <b>30.5 (21.9,39.0)</b> |
| Foot exam                                                     | 255                            | 46 (38,54)    | 4253                            | 72 (71,74)    | <b>26.5 (17.7,35.3)</b> |
| Eye exam                                                      | 260                            | 42 (33,50)    | 4390                            | 63 (61,65)    | <b>21.3 (12.6,30.1)</b> |
| <b>High-Value Counseling Composite</b>                        | 11320                          | 24 (23,25)    | 34308                           | 50 (50,51)    | <b>26.7 (25.5,27.9)</b> |
| Weight loss counseling                                        | 9894                           | 19 (18,21)    | 30741                           | 45 (44,46)    | <b>25.8 (24.5,27.2)</b> |
| Exercise counseling                                           | 9893                           | 24 (23,26)    | 30739                           | 51 (50,52)    | <b>26.6 (25.2,27.9)</b> |
| Smoking cessation counseling                                  | 3147                           | 31 (29,33)    | 8514                            | 63 (62,64)    | <b>32.1 (29.8,34.4)</b> |
| <b>High-Value Medical Treatment Composite</b>                 | 1000                           | 28 (25,31)    | 15263                           | 38 (37,39)    | 9.6 (6.4,12.9)          |
| Anticoagulation for atrial fibrillation                       | 91                             | 14 (3,24)     | 1444                            | 32 (29,36)    | <b>18.7 (15.3,22.1)</b> |
| ACEi/ARB for heart failure                                    | 17                             | 57 (30,84)    | 549                             | 64 (59,70)    | <b>7.8 (6.1,9.5)</b>    |
| Beta blocker for heart failure                                | 17                             | 34 (8,61)     | 549                             | 49 (42,56)    | <b>14.7 (13.1,16.3)</b> |
| Salicylates and/or platelet aggregation inhibitors for CAD/MI | 161                            | 22 (13,31)    | 2908                            | 25 (23,27)    | 3.2 (-5.5,11.8)         |
| Beta blocker for CAD/MI                                       | 161                            | 50 (40,59)    | 2908                            | 54 (51,57)    | 4.3 (-5.4,14.0)         |
| Statin for CAD/MI                                             | 161                            | 37 (27,47)    | 2908                            | 57 (54,59)    | <b>20.0 (9.9,30.2)</b>  |
| Statin for dyslipidemia                                       | 328                            | 67 (61,73)    | 6608                            | 78 (77,80)    | <b>11.3 (5.1,17.4)</b>  |
| ACEi/ARB for diabetes & hypertension                          | 114                            | 58 (47,70)    | 3012                            | 64 (61,66)    | 5.1 (-2.2,12.4)         |
| Statin for CVA                                                | 40                             | 15 (3,27)     | 724                             | 43 (38,49)    | <b>28.3 (27.6,29.1)</b> |
| Antiplatelet for CVA                                          | 40                             | 4 (0,9)       | 724                             | 27 (23,32)    | <b>22.8 (21.6,24.0)</b> |
| Controller medication for poorly controlled asthma            | 30                             | 69 (52,86)    | 561                             | 75 (70,79)    | <b>5.6 (5.3,5.9)</b>    |
| Controller medication for poorly controlled COPD              | 20                             | 10 (-5,25)    | 423                             | 38 (32,43)    | *                       |
| <b>Low-Value Cancer Screening Composite</b>                   | 462                            | 31 (26,37)    | 6921                            | 53 (52,55)    | <b>21.9 (16.5,27.4)</b> |
| Cervical cancer screening in older adults                     | 342                            | 33 (26,39)    | 5323                            | 61 (59,63)    | <b>28.3 (21.7,34.9)</b> |
| Colorectal cancer screening in older adults                   | 235                            | 20 (13,28)    | 4014                            | 32 (30,34)    | <b>11.7 (4.1,19.4)</b>  |
| Prostate cancer screening in older adults                     | 98                             | 43 (31,55)    | 1375                            | 73 (70,76)    | <b>30.0 (23.2,36.9)</b> |
| <b>Low-Value Antibiotic Use Composite</b>                     | 457                            | 53 (46,59)    | 4247                            | 56 (54,58)    | 3.3 (-3.1,9.7)          |
| Antibiotics for acute upper respiratory infection             | 400                            | 55 (49,62)    | 3813                            | 58 (56,60)    | 2.2 (-4.6,8.9)          |
| Antibiotics for influenza                                     | 62                             | 34 (20,48)    | 471                             | 42 (36,47)    | *                       |
| <b>Low-Value Medical Treatment Composite</b>                  | 2408                           | 4 (3,5)       | 22045                           | 9 (8,9)       | <b>4.7 (3.7,5.8)</b>    |
| Anxiolytics, sedatives, & hypnotics in the elderly            | 706                            | 3 (1,5)       | 9399                            | 7 (7,8)       | <b>4.1 (1.7,6.6)</b>    |
| Benzodiazepine for depression                                 | 845                            | 2 (1,4)       | 5096                            | 10 (8,11)     | <b>7.3 (5.6,9.0)</b>    |
| Opioid for headache                                           | 87                             | 2 (-1,5)      | 907                             | 1 (0,1)       | -1.4 (-1.5,-1.4)        |

|                                                              |      |            |       |            |                         |
|--------------------------------------------------------------|------|------------|-------|------------|-------------------------|
| Opioid for back pain                                         | 463  | 2 (0,3)    | 3512  | 3 (2,4)    | 1.2 (-0.3,2.8)          |
| NSAID use for hypertension, heart failure, or kidney disease | 841  | 9 (6,11)   | 12671 | 13 (12,13) | <b>3.7 (1.4,6.1)</b>    |
| Low-Value Imaging Composite                                  | 542  | 12 (10,14) |       |            | -1.0 (-3.4,1.4)         |
| MRI/CT for back pain                                         | 463  | 6 (3,8)    | 3512  | 6 (5,7)    | 0.3 (-2.4,3.0)          |
| X-ray for back pain                                          | 463  | 18 (14,23) | 3512  | 17 (15,18) | -1.5 (-6.0,3.0)         |
| MRI/CT for headache                                          | 87   | 11 (4,18)  | 907   | 9 (7,11)   | <b>-2.1 (-2.9,-1.3)</b> |
| <hr/>                                                        |      |            |       |            |                         |
| Respondent Experience: Global Rating of Health Care          | 5844 | 63 (62,65) | 36486 | 75 (75,76) | <b>11.9 (10.2,13.7)</b> |
| Respondent Experience: Doctor Communication Composite        | 5930 | 48 (46,50) | 36723 | 58 (57,58) | <b>9.8 (8.2,11.4)</b>   |
| Doctor listened to you                                       | 5829 | 48 (46,50) | 36440 | 59 (58,60) | <b>11.2 (9.5,12.9)</b>  |
| Doctor explained so you understood                           | 5863 | 52 (51,54) | 36580 | 60 (60,61) | <b>8.0 (6.1,9.9)</b>    |
| Doctor showed respect                                        | 5871 | 52 (50,54) | 36601 | 62 (61,63) | <b>9.9 (8.2,11.7)</b>   |
| Doctor spent enough time with you                            | 5869 | 40 (38,42) | 36560 | 50 (49,50) | <b>9.7 (7.9,11.6)</b>   |
| Respondent Experience: Access to Care Composite              | 6227 | 42 (40,44) | 35035 | 52 (51,53) | <b>9.8 (8.1,11.5)</b>   |
| Got care when ill or injured as soon as wanted               | 3069 | 47 (45,49) | 14910 | 61 (60,62) | <b>14.4 (11.8,17)</b>   |
| Got medical appointment as soon as wanted                    | 4980 | 40 (38,42) | 32595 | 49 (48,50) | <b>8.8 (6.7,10.9)</b>   |

<sup>a</sup>: Positive difference: respondents with primary care received more (high- or low-value) care or had better experience. Negative difference: respondents without primary care received more (high- or low-value) care or had better experience.

\*: insufficient sample size

**Bold** indicates  $p < 0.05$ .
